# Supplementary figures and images for: Chemo-enzymatic synthesis of bicyclic 3′-azido- and 3′-amino-nucleosides
Source: Royal Society of Chemistry journal article supplement (doi:10.1039/c4ra06805j), 2014-08-13

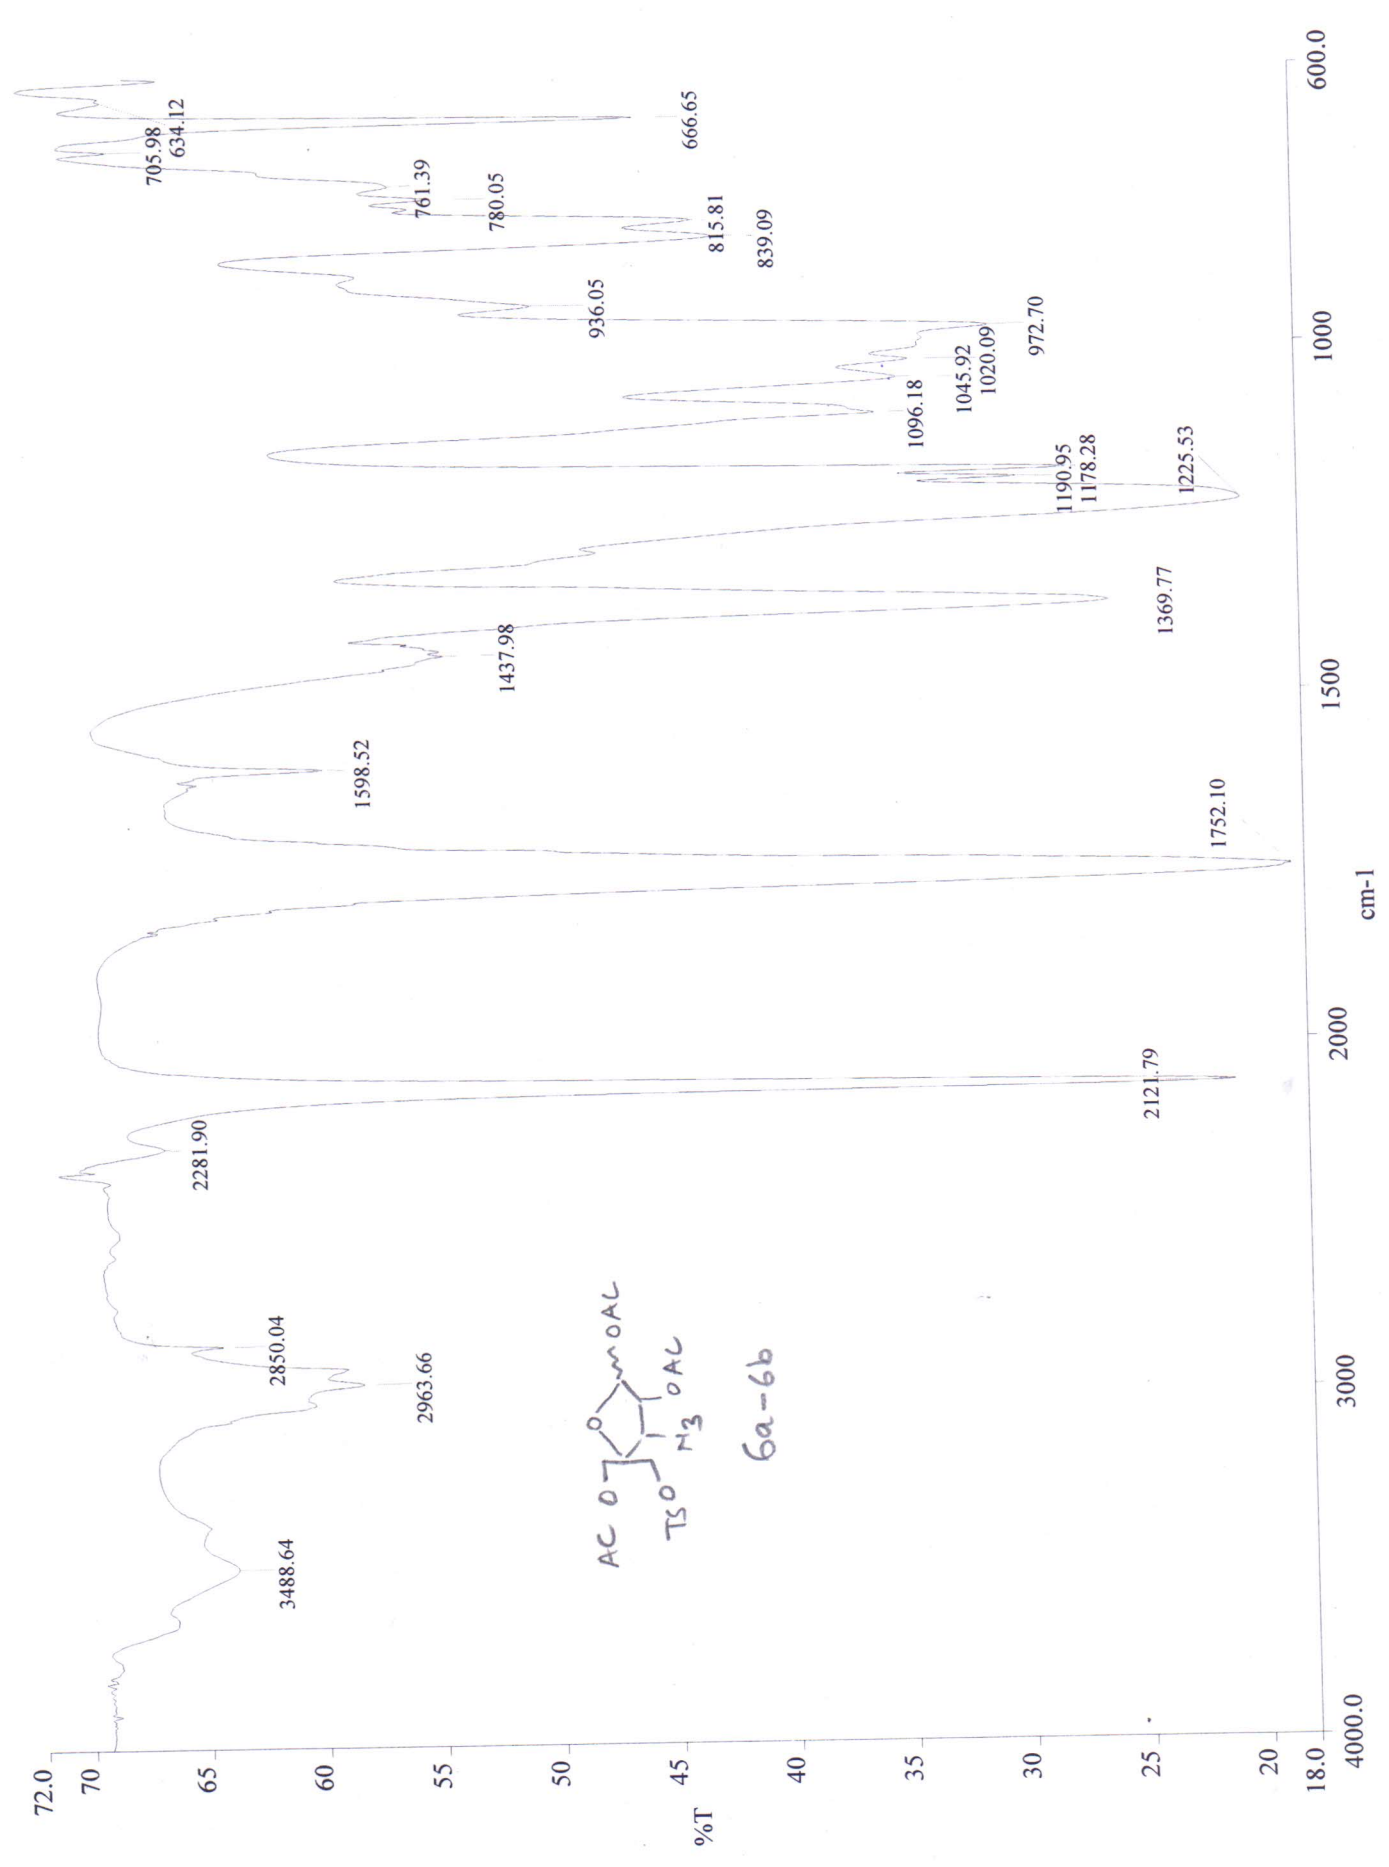

Supplement: c4ra06805j1.pdf [file c4ra06805j1.pdf]
